# Supplementary material
Source: Springer Nature journal article supplement (https://www.springermedizin.de/resource/supplementary/12245_2012_110_MOESM4_ESM.pdf/9672794)

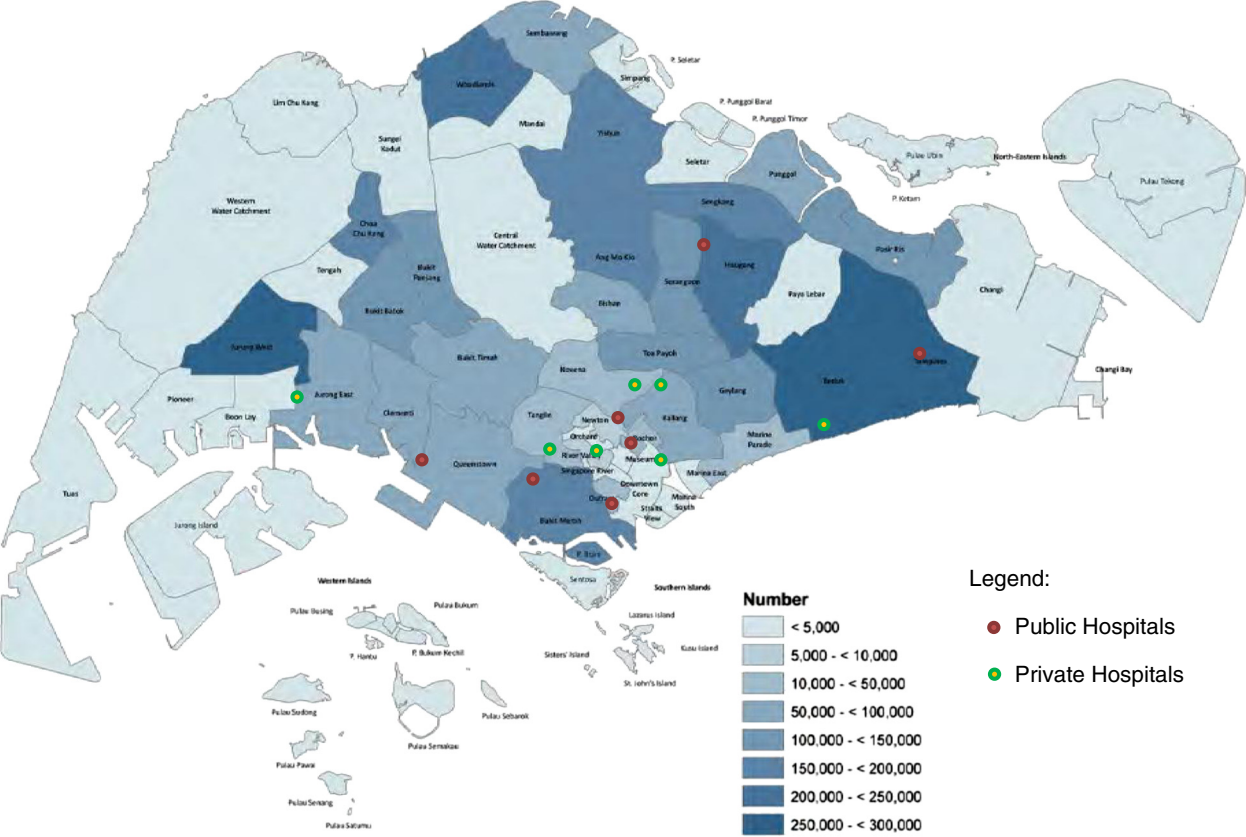

Supplement: MOESM4 [file 9672794]
